# Supplementary material
Source: Springer Nature journal article supplement (https://www.springermedizin.de/resource/supplementary/12943_2007_308_MOESM1_ESM.pdf/9553892)
Supplement: MOESM1 [file 9553892]

**M1557 peptide**

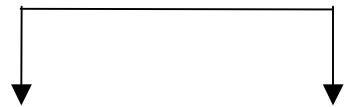

**GPETLCGAELVDALQFVCGDRGFYFNKPTGYGSSRRAPQTGIVDECCFRSCDLRRLEMYCAPLKPAKSA**

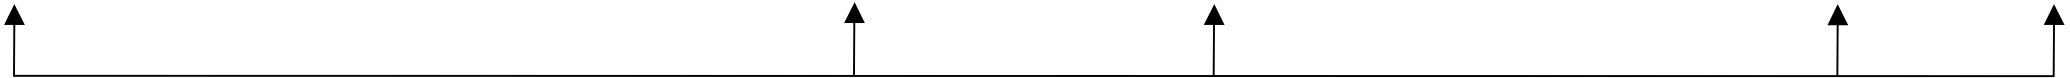

**Domains**

**B**

**C**

**A**

**D**
